# Supplementary material for: Synthesis and characterization of hollow dual-tube MOF hybrid nanocomposites for electroanalytical applications
Source: Royal Society of Chemistry journal article supplement (doi:10.1039/d4nj01183j), 2024-01-01
Supplement: d4nj01183j1.pdf [file d4nj01183j1.pdf]

## Supporting Information

### **Synthesis and characterization of hollow dual-tube MOFs hybrid nanocomposites for electroanalytical application**

Junfeng Wang,<sup>a</sup> Shuyue Tian,<sup>b</sup> Sihua Pan,<sup>a</sup> Yujuan Zhang,<sup>a</sup> Wang Sun<sup>c</sup> and Yang Wang<sup>\*c</sup>

<sup>a</sup> Department of Otolaryngology & Head and Neck Surgery, Affiliated Hospital of Yangzhou University, Yangzhou 225003, China.

<sup>b</sup> Department of Otolaryngology & Head and Neck Surgery, Affiliated Hospital of Jiangsu University, Zhenjiang 212013, China.

<sup>c</sup> School of Chemistry and Chemical Engineering, Yangzhou University, Yangzhou 225002, China.

\* Corresponding authors: wangyuz@126.com (Y. Wang)

## Content

|                                                                                                                                                          |   |
|----------------------------------------------------------------------------------------------------------------------------------------------------------|---|
| Fig. S1 TEM images of HTZIF-8 (A) and HTZIF-8@CNTs (B).....                                                                                              | 3 |
| Fig. S2 The DPV curves of HTZIF-8@CNTs/GCE in the presence of 0.1 mmol/L AA (A) and 10 mmol/L AA (B).....                                                | 4 |
| Fig. S3 Zeta potential of HTZIF-8 in deionized water (the inset image presents the physical image. Error bars: three times independent assessments)..... | 5 |

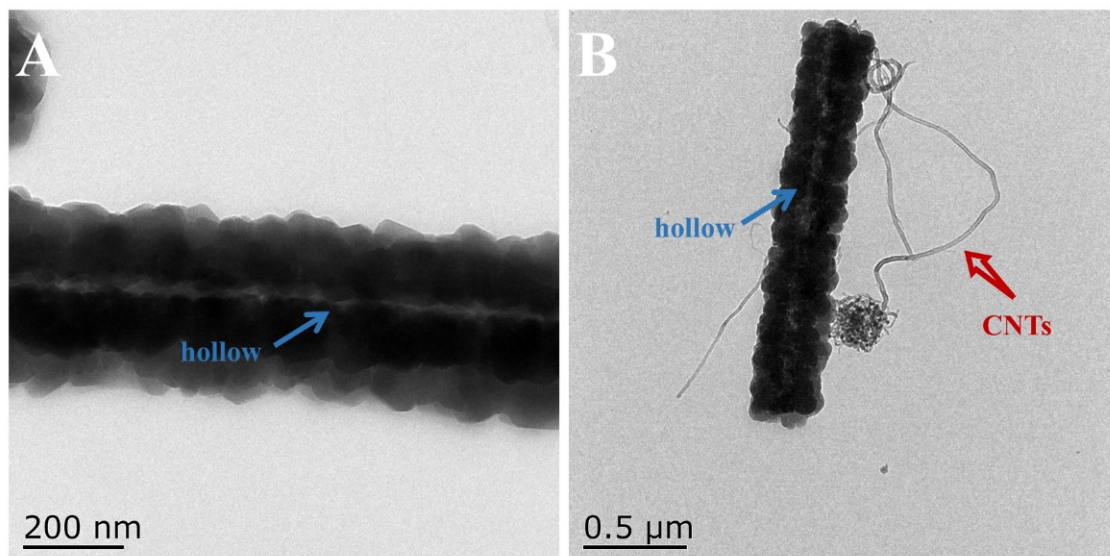

**Fig. S1** TEM images of HTZIF-8 (A) and HTZIF-8@CNTs (B).

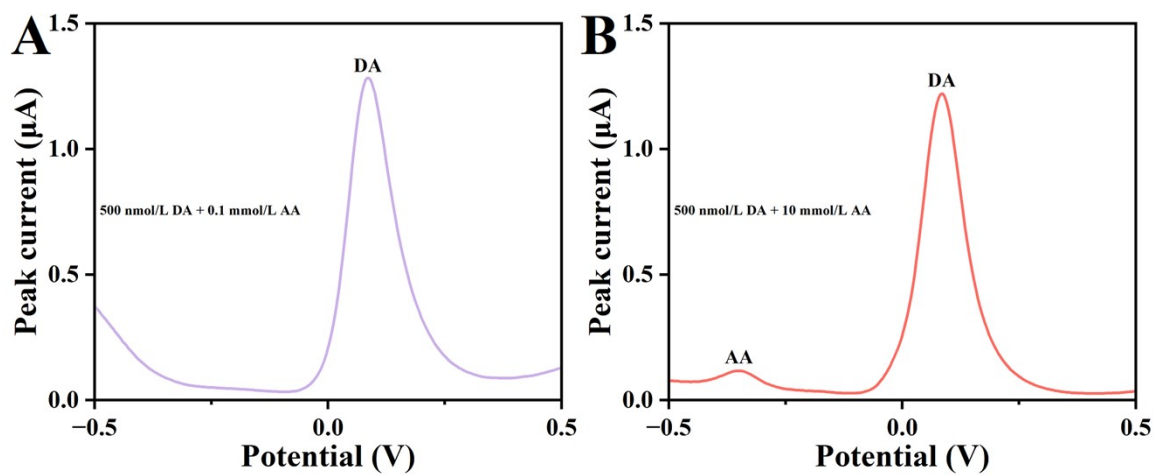

**Fig. S2** The DPV curves of HTZIF-8@CNTs/GCE in the presence of 0.1 mmol/L AA (A) and 10 mmol/L AA (B).

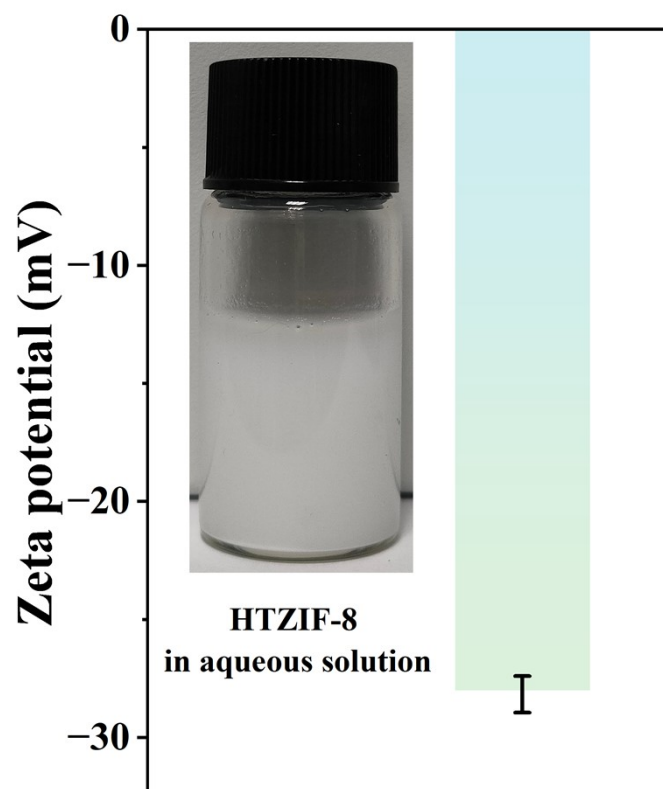

**Fig. S3** Zeta potential of HTZIF-8 in deionized water (the inset image presents the physical image. Error bars: three times independent assessments).
